# Supplementary material
Source: Springer Nature journal article supplement (https://www.springermedizin.de/resource/supplementary/12889_2011_3925_MOESM3_ESM.pdf/9491110)

19,023 titles found

Titles screened for eligibility

3,744 abstracts identified

Abstracts screened for eligibility

407 papers screened for possible morbidity data

Papers screened for eligibility

335 excluded based on exclusion criteria

72 included in the analysis

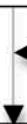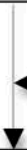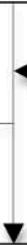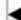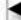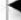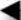

Supplement: MOESM3 [file 9491110]
